# Supplementary material for: Evaluation of 5-fluorouracil-treated lung cancer cells by atomic force microscopy
Source: Royal Society of Chemistry journal article supplement (doi:10.1039/c9ay01485c), 2019-01-01
Supplement: c9ay01485c1.pdf [file c9ay01485c1.pdf]

## Supporting Information

### Evaluations of 5-fluorourcil treated Lung cancer cells by Atomic Force Microscope

Xiaolin Jiang,<sup>a</sup> Ke Ma,<sup>\*a</sup> Cuihua Hu,<sup>\*a</sup> Mingyan Gao,<sup>a</sup> Jiashuo Zhang,<sup>b</sup> Ying Wang,<sup>a</sup> Yujuan Chen,<sup>c</sup> Zhengxun Song<sup>a</sup> and Zuobin Wang<sup>\*a,d</sup>

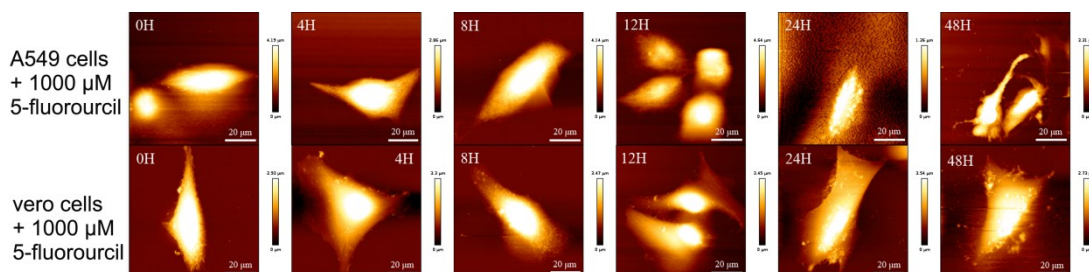

Figure S1 - Morphology of A549 cells and vero cells treated with 1000 μM 5-fluorourcil under different incubation time (0, 4, 8, 12, 24 and 48 h); Scale bars: 20 μm.

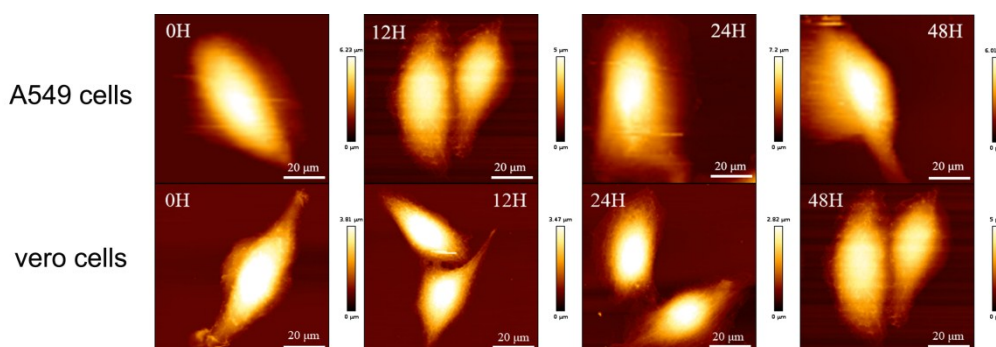

Figure S2 - Morphology of A549 cells and vero cells treated with 250 μM concentration of 5-fluorourcil under different incubation time (0, 12, 24 and 48 h); Scale bars: 20 μm.

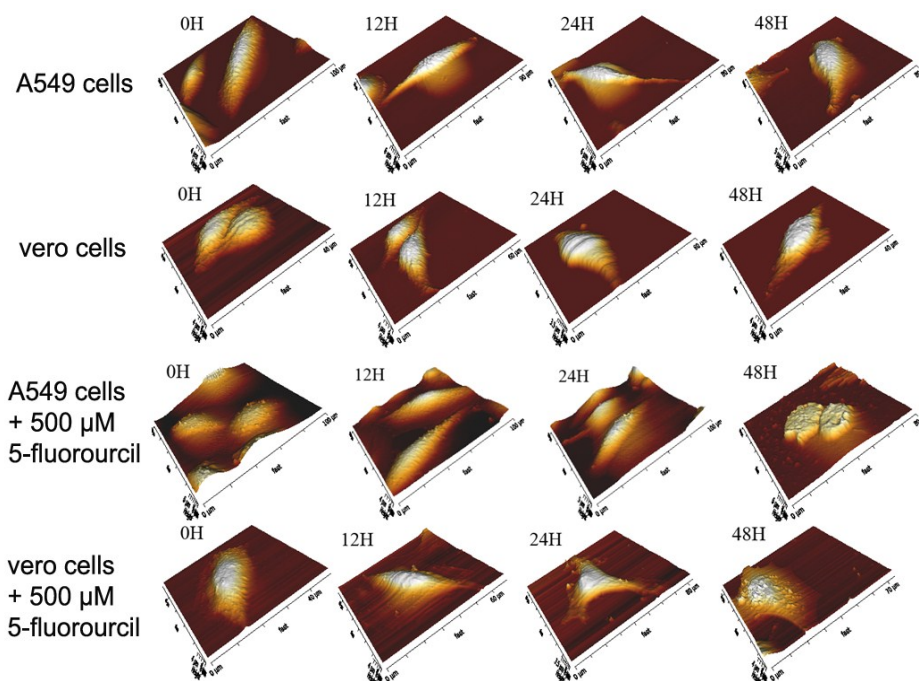

Figure S3 – 3D maps of A549 cells and vero cells treated with different concentrations of 5-fluorourcil (0 and 500) under different incubation time (0, 12, 24 and 48 h); Scale bars: 20 μm.

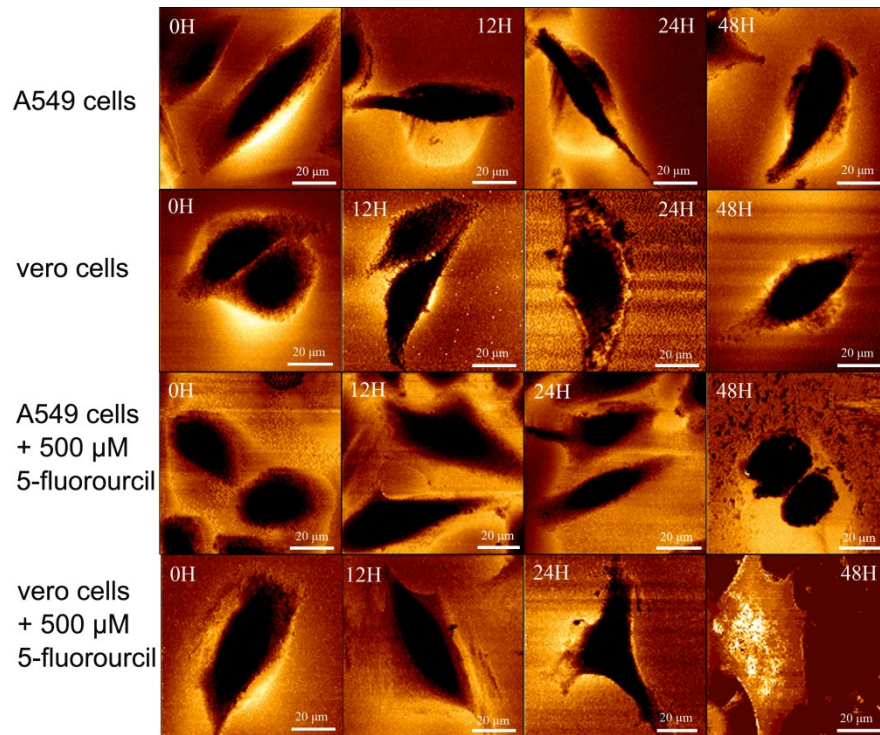

Figure S4 – Adhesion maps of A549 cells and vero cells treated with different concentrations of 5-fluorouracil (0 and 500) under different incubation time (0, 12, 24 and 48 h); Scale bars: 20 μm.

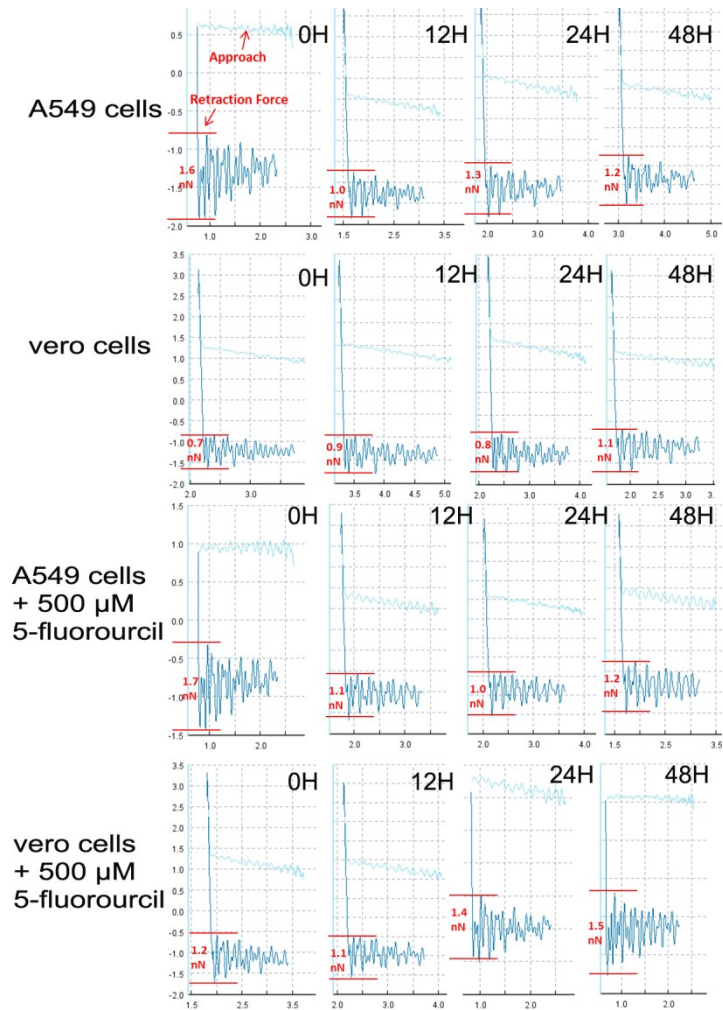

Figure S5 – Force curve of A549 cells and vero cells treated with different concentrations of 5-fluorouracil (0 and 500) under different incubation time (0, 12, 24 and 48 h).

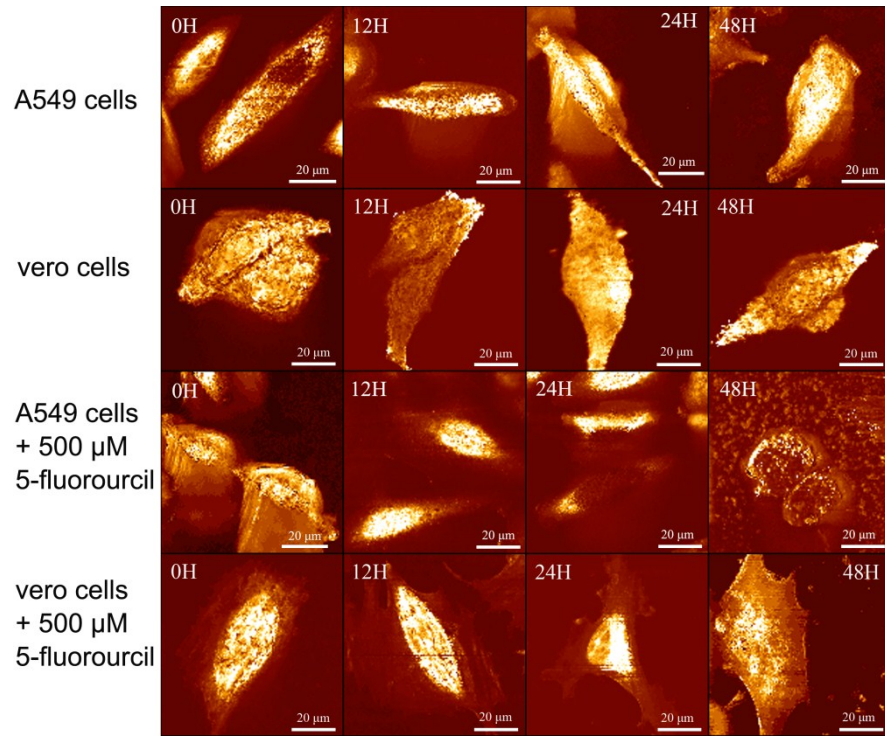

Figure S6 – Young's modulus maps of A549 cells and vero cells treated with different concentrations of 5-fluorourcil (0 and 500) under different incubation time (0, 12, 24 and 48 h); Scale bars: 20 μm.
